# Supplementary material for: Progressive fuzzy cation-π assembly of biological catecholamines
Source: PubMed Central journal article supplement — Sci Adv. 2018 Sep 7;4(9):eaat7457. doi: 10.1126/sciadv.aat7457 (PMC6128673; doi:10.1126/sciadv.aat7457), 2018-09-07
Supplement: aat7457_SM.pdf [file aat7457_SM.pdf]

## Supplementary Materials for Progressive fuzzy cation- $\pi$ assembly of biological catecholamines

Seonki Hong\*, Younseon Wang, Sung Young Park, Haeshin Lee\*

\*Corresponding author. Email: haeshin@kaist.ac.kr (H.L.); seonkihong@dgist.ac.kr (S.H.)

Published 7 September 2018, *Sci. Adv.* **4**, eaat7457 (2018)

DOI: 10.1126/sciadv.aat7457

### The PDF file includes:

Fig. S1. Chemical structure of oligomers formed during polydopamine coating under St-Bc pH conditions analyzed by HPLC-MS with a C18 column.

Fig. S2. XPS analyses of polydopamine-coated TiO<sub>2</sub> surfaces after 1 hour of strong base treatment.

Fig. S3. Maintenance of polydopamine coating on a TPU film in 0.1 N KOH (pH 12) solution for 1 hour.

Fig. S4. Intercalation of NMe<sub>4</sub><sup>+</sup> on polydopamine coating with pH variations.

Fig. S5. Wettability of polydopamine-coated substrates in Md-Bc and St-Bc conditions in the presence and absence of 1 M choline, a precursor to neurotransmitter ACh.

Fig. S6. Surface morphologies of the NMe<sub>4</sub><sup>+</sup>-intercalated polydopamine functionalized surfaces at St-Bc with 0.1 M NMe<sub>4</sub><sup>+</sup> (top) and 1 M NMe<sub>4</sub><sup>+</sup> (bottom) by SEM and atomic force microscopy analyses.

### Other Supplementary Material for this manuscript includes the following:

(available at [advances.sciencemag.org/cgi/content/full/4/9/eaat7457/DC1](https://advances.sciencemag.org/cgi/content/full/4/9/eaat7457/DC1))

Movie S1 (.mp4 format). Stability of polydopamine coating in NaOH, DDW, and KOH solution.

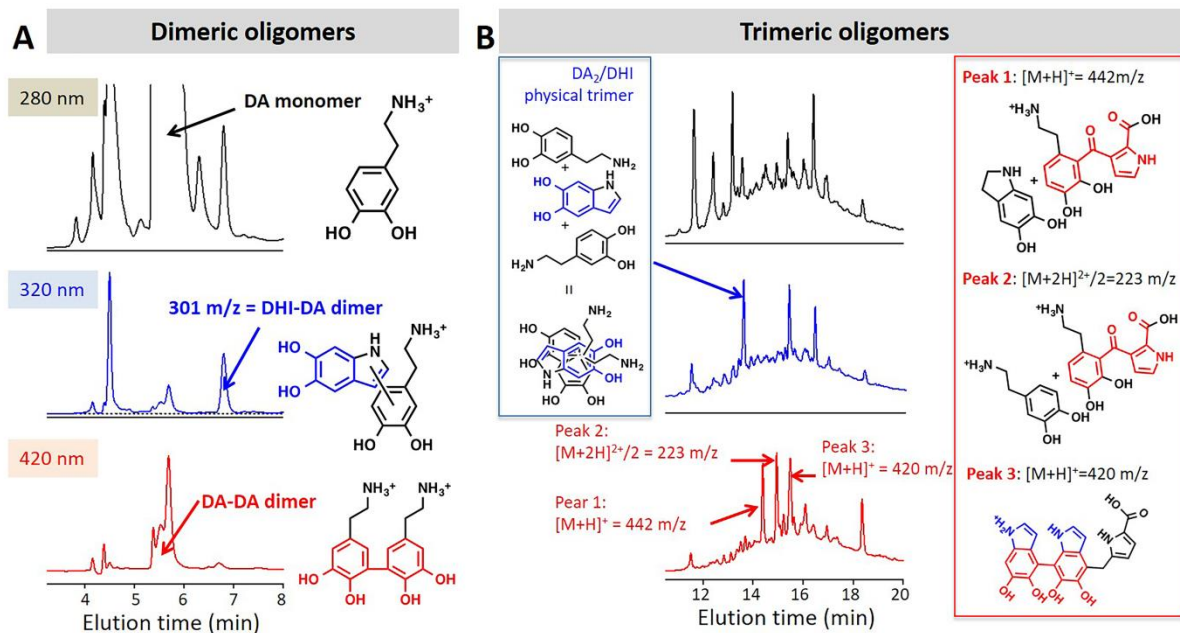

**Fig. S1. Chemical structure of oligomers formed during polydopamine coating under St-Bc pH conditions analyzed by HPLC-MS with a C18 column. (A)** Dimeric intermediates detected at approximately 4–8 min of elution time identified by both mass spectra and UV absorbance at 280 nm (black line), 320 nm (blue line), and 420 nm (red line). **(B)** Trimeric oligomers including the pre-defined (dopamine)<sub>2</sub>/DHI (DA<sub>2</sub>/DHI) physical trimer (blue box) and newly identified ones assigned as trimers containing partially opened/degraded DHI subunits (red box).

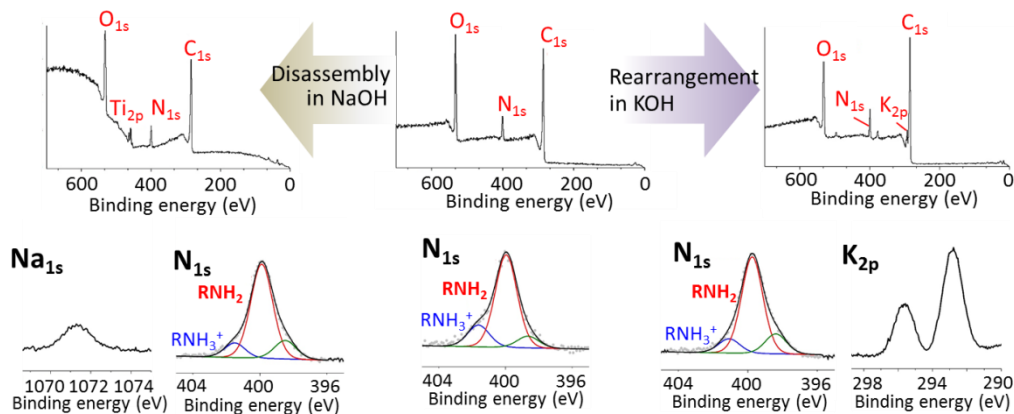

**Fig. S2. XPS analyses of polydopamine-coated TiO<sub>2</sub> surfaces after 1 hour of strong base treatment.** (i.e., 0.1 N NaOH (pH 11) and 0.1 N KOH (pH 11)). 1<sup>st</sup> row: survey scan and 2<sup>nd</sup> row: cation moieties (Na<sub>1s</sub> and K<sub>1s</sub>) and nitrogen (-NH<sub>3</sub><sup>+</sup> in blue, -NH<sub>2</sub> in red, and -NH- in green) species. The protonated amines (-NH<sub>3</sub><sup>+</sup>) in the polydopamine-coated TiO<sub>2</sub> surface under Md-Bc existed above 35% (401.6-401.8 eV), whereas most protonated amines disappeared after both base treatments (below 8%).

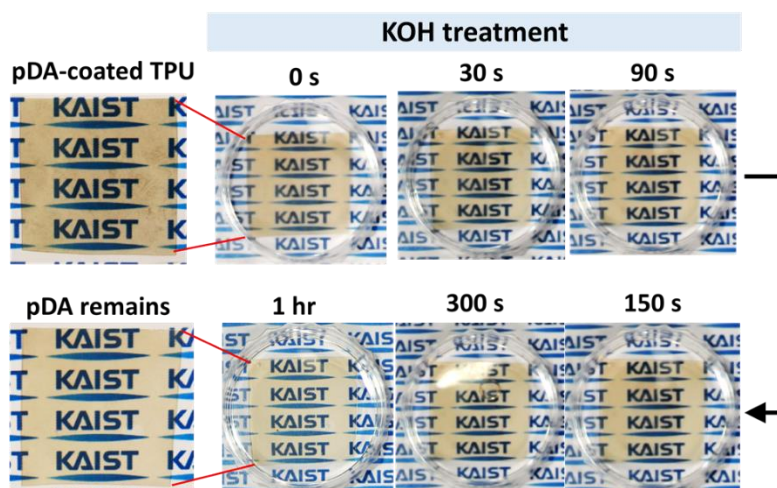

**Fig. S3. Maintenance of polydopamine coating on a TPU film in 0.1 N KOH (pH 12) solution for 1 hour.**

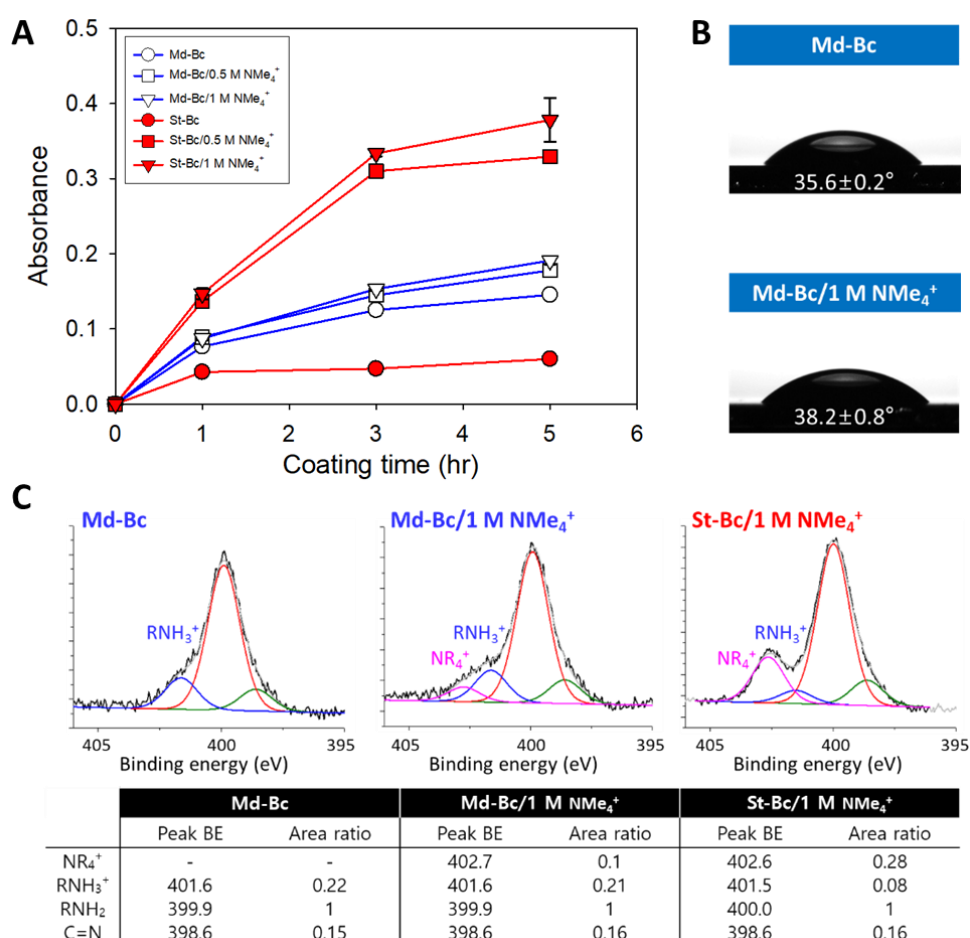

**Fig. S4. Intercalation of NMe<sub>4</sub><sup>+</sup> on polydopamine coating with pH variations.** (A) The initial polydopamine film growth rate monitored by UV absorption at 400 nm on a transparent glass substrate as the surface color becomes dark brown progressively (Blue lines: Md-Bc, Red lines: St-Bc / circle: no NMe<sub>4</sub><sup>+</sup>, square: with 0.5 M NMe<sub>4</sub><sup>+</sup>, reverse triangle: with 1 M NMe<sub>4</sub><sup>+</sup>). (B) Wettability of polydopamine coated substrates in Md-Bc, with (bottom) and without (top) presence of NMe<sub>4</sub><sup>+</sup>. (C) XPS N<sub>1s</sub> high resolution analysis of polydopamine coating in Md-Bc (left), Md-Bc with NMe<sub>4</sub><sup>+</sup> (middle), and St-Bc with NMe<sub>4</sub><sup>+</sup> (right): pink line for NMe<sub>4</sub><sup>+</sup>, blue line for R- NH<sub>3</sub><sup>+</sup>, red line for R-NH<sub>2</sub>, and green line for C=N. Peak binding energy (denoted as peak BE) and the area ratio of each nitrogen peak are summarized in a table below the XPS N<sub>1s</sub> graphs.

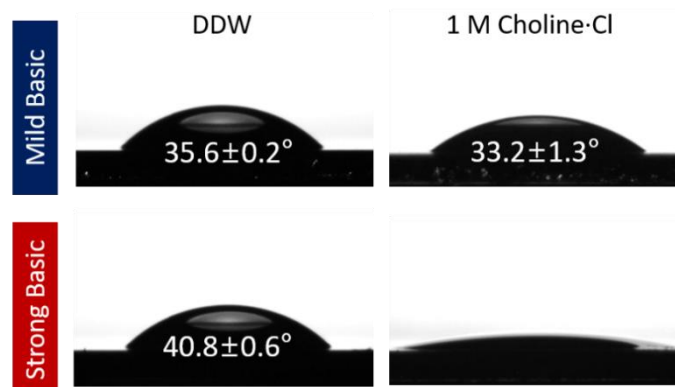

**Fig. S5.** Wettability of polydopamine-coated substrates in Md-Bc and St-Bc conditions in the presence and absence of 1 M choline, a precursor to neurotransmitter ACh.

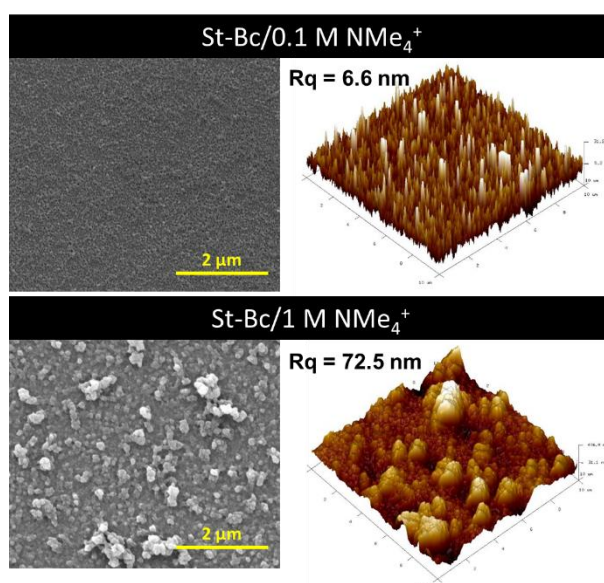

**Fig. S6.** Surface morphologies of the  $\text{NMe}_4^+$ -intercalated polydopamine functionalized surfaces at St-Bc with 0.1 M  $\text{NMe}_4^+$  (top) and 1 M  $\text{NMe}_4^+$  (bottom) by SEM and atomic force microscopy analyses.
